# Supplementary material for: Hydrothermal synthesis of lithium-enriched β-Li2TiO3 with an ion-sieve application: excellent lithium adsorption
Source: Royal Society of Chemistry journal article supplement (doi:10.1039/c6ra18018c), 2016-01-01
Supplement: c6ra18018c1.pdf [file c6ra18018c1.pdf]

## Supporting information

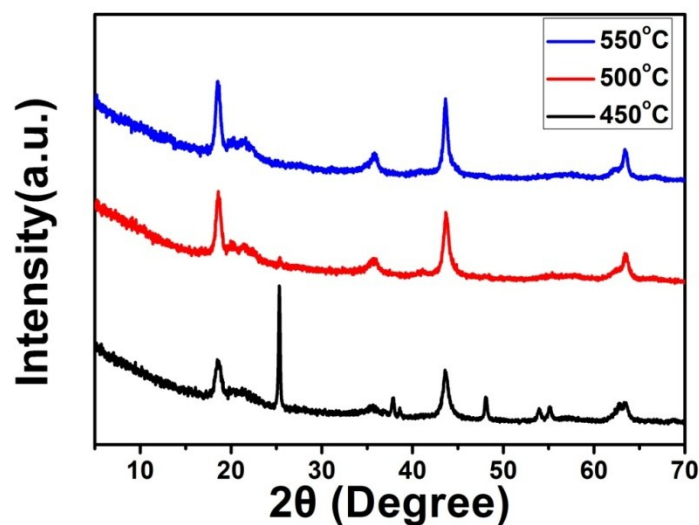

Fig. S1.  $\text{Li}_2\text{TiO}_3$  samples of different temperature of calcination.

The diffraction peaks of c- $\text{Li}_2\text{TiO}_3$  gradually became sharper with the increase of calcination temperature from 450 °C to 550 °C, indicating that the crystallinity of c- $\text{Li}_2\text{TiO}_3$  was closely related to the calcination conditions.

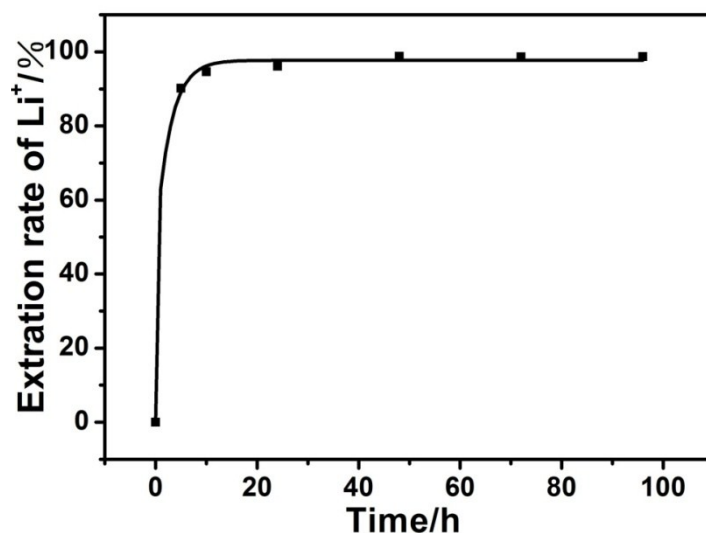

Fig. S2. Variation of  $\text{Li}^+$  ions extraction rate with reaction time.

Figure S2 shows the relationship between the lithium extraction and the extracting time. As can be seen from Fig. S2, the rate of lithium extracted reached 97.87 % when  $\text{Li}_2\text{TiO}_3$  was treated by pickling for 24 h. Then it increased slowly and reached 98.72% until the time extend to 30 hours. At the same time the content of the titanium ion in solution was almost zero through ICP-AES method, which suggested that titanium

was almost insoluble loss in the pickling process.

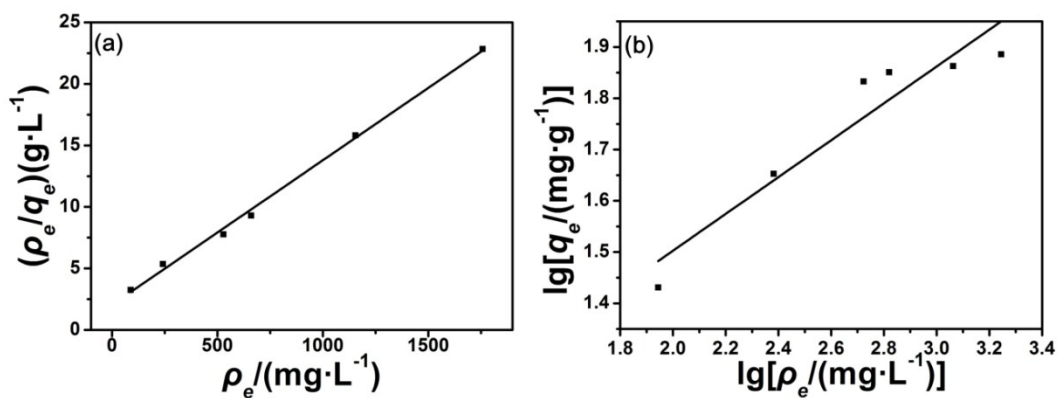

Fig. S3. Langmuir (A) and Freundlich (B) isotherms in LiOH solution

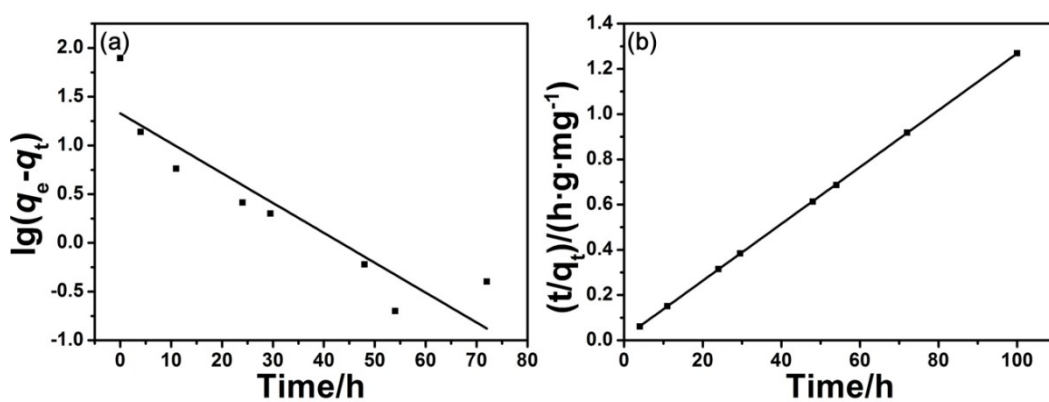

Fig. S4. Kinetic plots of lithium ion adsorption (A) Pseudo-first-order and (B) pseudo-second-order
